# Supplementary material for: Energy Platform for Directed Charge Transfer in the Cascade Z‐Scheme Heterojunction: CO2 Photoreduction without a Cocatalyst
Source: PubMed Central journal article supplement (PMC8518548; doi:10.1002/anie.202106929), 2021-08-13
Supplement: ANIE-60-20906-s001.pdf [file ANIE-60-20906-s001.pdf]

## Supporting Information

### **Energy Platform for Directed Charge Transfer in the Cascade Z-Scheme Heterojunction: CO<sub>2</sub> Photoreduction without a Cocatalyst**

*Ji Bian<sup>+</sup>, Ziqing Zhang<sup>+</sup>, Jiannan Feng, Madasamy Thangamuthu, Fan Yang, Ling Sun, Zhijun Li, Yang Qu, Dongyan Tang, Zewei Lin, Fuquan Bai,\* Junwang Tang,\* and Liqiang Jing\**

anie\_202106929\_sm\_miscellaneous\_information.pdf

## Experimental section

**Synthesis of BiVO<sub>4</sub> nanosheets.** In a typical synthesis, 2.21 g of BiCl<sub>3</sub> and 1.05 g of cetyltrimethylammonium bromide (CTAB) were dissolved in 60 mL of ethylene glycol under vigorous magnetic stirring. Then, 2.80 g of NaVO<sub>3</sub> was added into the above solution followed by stirring for 30 min. Then, the mixture was transferred into a 50 mL Teflon-lined autoclave, sealed, and heated at 120°C for 12 h. After the system was cooled down to room temperature, the resulting products were washed with ethanol and deionized water several times, and then dried at 60°C in a vacuum oven. Finally, the obtained sample was fast calcined for 8 min at 400°C and represented as BVNS.

**Synthesis of hydroxylated C<sub>3</sub>N<sub>4</sub> nanosheets.** Hydroxylated C<sub>3</sub>N<sub>4</sub> nanosheet was prepared by a modified method based on a previous report.<sup>[1]</sup> In a typical synthesis, 1 g of melamine and 1.2 g of phosphorous acid were dissolved in 100 mL of deionized water under vigorous magnetic stirring at 80°C in a water bath. Then the mixture was transferred into a 100 mL Teflon-lined autoclave, sealed, and heated at 180°C for 10 h. The resulting products were washed with deionized water several times and dried at 60°C in an oven. Afterward, 0.6 g of the prepared powder was refluxed with a mixed aqueous solution of 5 ml glycerol and 15 ml ethanol for 3 h at 90°C. Then, the obtained products were washed by ethanol several times and dried at 60°C. Subsequently, the resultant solids were heated to 500°C in a muffle furnace with a heating rate of 2°C/min for 2 hours. To obtain the hydroxylated C<sub>3</sub>N<sub>4</sub> nanosheet, the above few-layers C<sub>3</sub>N<sub>4</sub> were immersed in HNO<sub>3</sub> solution and refluxed boiling at 130°C for 6 h followed by washing with water until neutralizing the solution, which is dried in an oven. This sample is represented as CN.

**Synthesis of (001) facet-exposed anatase TiO<sub>2</sub> nanosheets.** In a typical procedure, 5 mL of Ti(OBu)<sub>4</sub> was mixed with 20 mL of absolute ethanol under vigorous stirring. After that, a hydrofluoric acid solution (0.9 mL, 40%) was added. The resulting solution was stirred for 1 h and transferred to a Teflon lined stainless-steel autoclave, and kept at 160°C for 24 h. After the system was cooled to room temperature, the white precipitate was collected, washed with ethanol and deionized water several times by turns, and named as T.

**Synthesis of CN coupled BVNS.** The CN coupled BVNS were prepared by the hydroxyl induced assembly method. In the typical synthesis, a proper amount of CN and BVNS were dispersed in 60 mL of ethanol, and ultrasound for 30 min. Then the above mixture was refluxed at 80°C for 2 h. Afterward, the obtained samples were washed with deionized water several times and dried at 60°C in an oven. This sample was represented as xCN/BVNS, where x (10, 15, and 20), which is determined by the mass ratio percentage of CN to BVNS.

**Synthesis of (001) facet-exposed TiO<sub>2</sub> nanosheets coupled CN/BVNS heterojunction.** The (001) facet-exposed TiO<sub>2</sub> nanosheets coupled CN/BVNS

heterojunction was synthesized through a two-step hydroxyl-induced assembly strategy. First, 15CN/BVNS heterojunction was synthesized as described above, and then the T was assembled on it as follows. A proper amount of T and 15CN/BVNS were dispersed in 60 mL of ethanol and ultrasonicated for 30 min. Then, the above mixture was refluxed at 80°C for 2 h. The obtained samples were washed with deionized water several times and dried at 60 °C in an oven. This sample was named as  $\gamma$ T-15CN/BVNS, where  $\gamma$  (3, 5, and 7), which is determined by the mass ratio percentage of T to BVNS.

**Synthesis of  $\alpha$ -Fe<sub>2</sub>O<sub>3</sub>.** In a typical procedure, 10 mL of 5 wt% ammonia solution was added into a 50 mL Teflon-lined autoclave. Then, a weighing bottle containing a mixture of 0.8 g Fe(NO<sub>3</sub>)<sub>3</sub>·9H<sub>2</sub>O and 8 mL n-butyl alcohol was placed in the autoclave with a support to separate with the ammonia solution. The Teflon-lined autoclave was kept at 140 °C for 6 h in an oven. After being cooled naturally to the room temperature, the sample was washed for several times with ethanol and deionized water in turn and then dried in an oven at 80 °C. Finally, the samples were calcined in air at 400°C for 2h.

**Synthesis of CN coupled Fe<sub>2</sub>O<sub>3</sub>.** In the typical synthesis, a proper amount of CN and Fe<sub>2</sub>O<sub>3</sub> were dispersed in 60 mL of ethanol, and ultrasound for 30 min. Then the above mixture was refluxed at 80°C for 2 h. Afterwards, the obtained samples were washed with deionized water for several times, and dried at 60°C in an oven. This sample was represented as CN/Fe<sub>2</sub>O<sub>3</sub>.

**Synthesis of (001) facet-exposed TiO<sub>2</sub> nanosheets (T) coupled CN/Fe<sub>2</sub>O<sub>3</sub> heterojunction.** In a typical procedure, the CN/Fe<sub>2</sub>O<sub>3</sub> heterojunction was synthesized as described above, and then the T was assembled on it as follows. A proper amount of T and CN/Fe<sub>2</sub>O<sub>3</sub> were dispersed in 60 mL of ethanol, and ultrasonicated for 30 min. Then, the above mixture was refluxed at 80°C for 2 h. Afterwards, the obtained samples were washed with deionized water for several times, and dried at 60°C in an oven. This sample was represented as T-CN/Fe<sub>2</sub>O<sub>3</sub>.

**Synthesis of WO<sub>3</sub>.** In a typical procedure, 0.22 g of polyethylene oxide-polypropylene oxide-polyethylen (P123) (Pluronic, M=5800) was dissolved in 14.44 g of ethanol absolute under vigorous magnetic stirring. Then, a certain amount of deionized water and 1.5 mL of ethylene glycol was added to the above mixture and stirred for 2 h to form a clear solution. Finally, the solution was sealed and kept in a brown reagent bottle at least 48 h before using. The solution was named as solution P. 0.44 g of WCl<sub>6</sub> was added to 16.83 g of solution P, and stirred for 20 min to obtain a yellow solution. The solution was then transferred to a 50 mL of Teflon-lined autoclave to be kept under 110°C for 3 h, and naturally cooled to room temperature. After the solvothermal treatment, the precipitate was washed with absolute ethanol, then dried in a vacuum oven at 80°C for 12 h. After that, the obtained sample was calcined for 1 h at 400°C and represented as WO<sub>3</sub>.

**Synthesis of CN coupled WO<sub>3</sub>.** In the typical synthesis, a proper amount of CN and WO<sub>3</sub> were dispersed in 60 mL of ethanol, and ultrasound for 30 min. Then the above mixture was refluxed at 80°C for 2 h. Afterwards, the obtained samples were washed with deionized water for several times, and dried at 60°C in an oven. This sample was represented as CN/WO<sub>3</sub>.

**Synthesis of (001) facet-exposed TiO<sub>2</sub> nanosheets (T) coupled CN/WO<sub>3</sub> heterojunction.** In a typical procedure, the CN/WO<sub>3</sub> heterojunction was synthesized as described above, and then the T was assembled on it as follows. A proper amount of T and CN/WO<sub>3</sub> were dispersed in 60 mL of ethanol, and ultrasonicated for 30 min. Then, the above mixture was refluxed at 80°C for 2 h. Afterwards, the obtained samples were washed with deionized water for several times, and dried at 60°C in an oven. This sample was represented as T-CN/WO<sub>3</sub>.

**Synthesis of SnO<sub>2</sub> nanoparticles.** In the typical synthesis, 2 g of SnCl<sub>4</sub>·5H<sub>2</sub>O was dissolved in deionized water and NaOH solution was added dropwise to it under continuous stirring. At the beginning, a white cloudy suspension was formed in the acidic pH range which slowly disappeared with the addition of more NaOH solution. After the pH value reached about 12, solution became transparent. This solution was transferred to 100 mL Teflon-lined stainless steel autoclave and calcined at 200°C for 12 h. The product was cooled to room temperature naturally and washed three times with distilled water to remove impurities. The purified white powder was dried in an oven overnight at 60°C to obtain SnO<sub>2</sub> nanoparticles.

**Synthesis of SnO<sub>2</sub> coupled CN/BVNS heterojunction.** In a typical procedure, the 15CN/BVNS heterojunction was synthesized as described before, and then the SnO<sub>2</sub> was assembled on it as follows. A proper amount of SnO<sub>2</sub> and 15CN/BVNS were dispersed in 60 mL of ethanol and ultrasonicated for 30 min. Then, the above mixture was refluxed at 80°C for 2 h. The obtained samples were washed with deionized water several times and dried at 60°C in an oven. This sample was named as SnO<sub>2</sub>-15CN/BVNS.

**Preparation of 5T/BVNS/15CN and 5T/15CN/BVNS electrodes.** Both 5T/BVNS/15CN and 5T/15CN/BVNS were obtained by blade-coating the dispersion of these components on FTO glass in sequence, followed by calcination at 300 °C for 30 min in air. In a typical procedure, for 5T/BVNS/15CN photoelectrode synthesis, BVNS, CN and T were firstly dispersed in a mixture solution of Nafion and ethanol with the volume ratio of 1:9 under vigorous stirring to make individual solution, respectively. Then a certain amount of T droplets was dropped on a FTO glass substrate, followed by a blade-coating procedure. Then, the CN was dispersed on the T coated FTO glass, and last the BVNS was dispersed on the substrate. Finally, the sample was calcined at 300 °C for 30 min in a muffle furnace, denoted as 5T/15CN/BVNS. Similarly, 5T/BVNS/15CN electrode was obtained by a same method but with a different coating sequence, swapping CN and BVNS.

## Characterizations

The X-ray powder diffraction (XRD) patterns of the samples were collected by a Bruker D8 advance diffractometer with CuK $\alpha$  radiation. The UV-Vis diffuse reflectance spectra (UV-Vis DRS) of the samples were acquired using Shimadzu UV 2550 spectrophotometer with BaSO<sub>4</sub> as a reference. The Fourier-transform infrared (FT-IR) spectra of the samples were recorded with a Bruker Equinox 55 spectrometer, KBr as the diluents. The morphologies of the samples were analyzed by transmission electron microscopy (TEM) on an FEI Tecnai G2 S-Twin instrument with an acceleration voltage of 200 kV. The FEI Tecnai G2 S-Twin equipped with Energy-dispersive X-ray (EDX) Detector was used to acquire element analysis of the samples. The surface photovoltage spectroscopy (SPS) measurements were carried on home-built apparatus, equipped with a lock-in amplifier (SR830, USA) synchronized with a light chopper (SR540, USA). The transient-state surface photovoltage (TPV) responses of the samples were recorded in the air at room temperature. The samples were excited by a radiation pulse of 355 nm with 10 ns width from the second harmonic of a neodymium-doped yttrium aluminum garnet (Nd:YAG) laser (Lab-130-10H, Newport, Co.). The signals were amplified with a preamplifier and registered with a 1 GHz digital phosphor oscilloscope (DPO 4104B, Tektronix). The Raman spectra were recorded with a Renishaw inVia Confocal Raman spectrometer with a 785 nm laser as the excitation source. The electron paramagnetic resonance (EPR) measurements were carried out on a Bruker EMX plus model spectrometer operating at the X-band frequency. The reactive  $\bullet\text{O}_2^-$  and  $\bullet\text{OH}$  species were detected by using 5,5-dimethyl-1-pyrroline N-oxide (DMPO) as a spin trap under visible-light irradiation. The X-ray photoelectron spectroscopy (XPS) was performed by Kratos-AXIS ULTRA DLD. Al (Mono) was used as the X-ray source.

**Hydroxyl radical measurement.** Hydroxyl radicals ( $\bullet\text{OH}$ ) are important active species in photocatalytic reaction. Using coumarin as a labeled molecule to detect the content of hydroxyl radicals is an effective method with high sensitivity. The specific method for the hydroxyl radical test is as follows: 0.02 g of the catalyst was placed in 50 mL of coumarin solution at a concentration of  $2 \times 10^{-4}$  M. The mixture was stirred for 30 min before the experiment, to ensure that it reached the adsorption-desorption equilibrium. After 1 h irradiation, appropriate amount of the suspension was centrifuged and the supernatant was transferred into a Pyrex glass cell for the fluorescence measurement of 7-hydroxycoumarin by a spectrofluorometer (Perkin-Elmer LS55). To cut off UV-light, a light filter of 420 nm was placed between the light source and the reactor.

**Photoelectrochemical and electrochemical measurements.** Photoelectrochemical (PEC) and electrochemical reduction measurements were carried out in a traditional three-electrode system. The prepared thin film electrode was used as a working electrode, a platinum plate (99.9%) as the counter electrode, and an Ag/AgCl as the reference electrode. A 0.2 M Na<sub>2</sub>SO<sub>4</sub> solution as the electrolyte. High purity nitrogen gas (99.999%) was bubbled through the electrolyte before and during the experiments. PEC experiments were performed in a quartz cell using a 500 W xenon lamp with a

cut-off filter ( $\lambda > 420$  nm) as the illumination source. An IVIUM V13806 electrochemical workstation was employed to test the photoelectrochemical and electrochemical performance of the series of photocatalysts. All the experiments were performed at room temperature (about 25 °C).

The surface charge transfer efficiency ( $\eta_{trans}$ ) was calculated using the following equations:

$$\eta_{trans} = \frac{J_{H_2O}}{J_{Na_2SO_3}}$$

$J_{H_2O}$  and  $J_{Na_2SO_3}$  are the photocurrent densities obtained in 0.2 M Na<sub>2</sub>SO<sub>4</sub> electrolytes (pH 6.8) at the applied potential of 0.2 V *versus* Ag/AgCl without and with 0.1 M Na<sub>2</sub>SO<sub>3</sub> as an efficient hole scavenger, respectively.

**Photocatalytic activities for CO<sub>2</sub> conversion.** 0.1 g of photocatalyst powder was suspended in 5 mL of water with magnetic stirring in a quartz reactor. A 300 W Xenon lamp was used as the light source with a 420 nm cut-off filter. High pure CO<sub>2</sub> gas was passed through water and then entered into the reaction setup for reaching ambient pressure. The photocatalyst was allowed to equilibrate in the CO<sub>2</sub>/H<sub>2</sub>O system for 20 min and then irradiated for 4 hours. During irradiation, about 0.25 mL of gas produced was taken from the reaction cell at given time intervals for CO and CH<sub>4</sub> concentration analysis using a gas chromatograph (GC-7920 with both TCD and FID detectors, Au Light, Beijing), and for O<sub>2</sub> evolution analysis using a gas chromatograph (GC-7900 with TCD, Perfect Light, Beijing). The isotope-labeled experiment was carried out using <sup>13</sup>CO<sub>2</sub> instead of CO<sub>2</sub>, and the reduction products were analyzed on a gas chromatography–mass spectrometry (GC-MS, MS5977A, Agilent). The isotopic D<sub>2</sub>O labelled experiment was conducted under identical photocatalytic CO<sub>2</sub> reduction reaction conditions, but H<sub>2</sub>O was substituted with a mixture of D<sub>2</sub>O and methanol. The reduction products were analyzed on a gas chromatography–mass spectrometry (GC-MS, MS5977A, Agilent).

**Photocatalytic activities for Overall water splitting.** The overall water splitting test was conducted by an integrated system composed of a photoreactor and an online analytic system (Perfectlight, Beijing, Labsolar-6A circulation system). In detail, 0.1 g of photocatalyst powder was dispersed in 100 mL of deionized water with a calculated amount of H<sub>2</sub>PtCl<sub>6</sub> as the cocatalyst precursor in a cubic glass cell and kept stirring. Ahead of the reaction, the mixture was deaerated by evacuation to remove O<sub>2</sub> and CO<sub>2</sub> dissolved in water. Subsequently, the reactor was exposed under a 300 W Xe lamp with a cutoff filter ( $\lambda \geq 420$  nm). The amount of the evolved H<sub>2</sub> and O<sub>2</sub> in the photocatalysis was analyzed by an online gas chromatograph (GC-2002, TCD, molecular sieve 5 Å, Ar carrier). The gas tight reactor can be guaranteed by measuring an extremely low leakage rate ( $\leq 5 \times 10^{-5}$  Pa•L/s), and the amount of O<sub>2</sub> leakage for 24 h is less than 1 μmol.

**DFT study.** All theoretical calculations were performed by the density functional theory (DFT) pseudopotential plane-wave method as implemented in the Vienna Ab initio

simulation package (VASP).<sup>[2,3]</sup> The all-electron projected argument wave (PAW)<sup>[4]</sup> potential was used to describe the ion-electron interaction. The exchange and correlation potential were described with the Perdew–Burke–Ernzerhof (PBE)<sup>[5]</sup> of the generalized gradient approximation (GGA). A van der Waals (vdW) interaction was described by the DFT-D2 method of Grimme.<sup>[6]</sup> The cutoff energy was set as 520 eV, and structure relaxation was performed until the convergence criteria of energy and force reached  $1 \times 10^{-5}$  eV and  $0.02 \text{ eV \AA}^{-1}$ , respectively. The Brillouin zone was sampled with  $3 \times 2 \times 1$  and  $6 \times 4 \times 1$  Monkhorst-Pack K-point mesh for the structure optimizations of  $\text{BiVO}_4$ ,  $\text{C}_3\text{N}_4$ , and anatase  $\text{TiO}_2$  and electronic structure calculations of  $\text{BiVO}_4/\text{C}_3\text{N}_4/\text{TiO}_2$  heterostructure or with their hydroxylated interface, respectively. And the band structure of the  $\text{BiVO}_4/\text{C}_3\text{N}_4/\text{TiO}_2$  heterostructure was calculated along the  $G \rightarrow X \rightarrow S \rightarrow Y \rightarrow G$  path. In the DFT-D2 scheme, all force field parameters are obtained based on the PBE functional. The detailed information of the ultrafast interfacial electron transfer (IET) processes is carried out using the semi-classical quantum dynamics method based on semiempirical EH Hamiltonian.<sup>[7]</sup> The EH method has been widely used to calculate the electronic structure of periodic condensed matter systems. It requires a small number of transferable parameters and can provide a reliable description of the chemical bonding and energy band of both elemental and bulk materials with relatively small computation expense. The IET computational details please refer to the literature for details and the calculation method therein.<sup>[8]</sup>

The optimized the lattice parameters were  $a=5.214 \text{ \AA}$ ,  $b=5.084 \text{ \AA}$  for unit cell of  $\text{BiVO}_4$ ,  $a=10.886 \text{ \AA}$ ,  $b=15.104 \text{ \AA}$  for  $\text{C}_3\text{N}_4$  monolayer and  $a=b=3.776 \text{ \AA}$ ,  $c=9.486 \text{ \AA}$  for unit cell of anatase  $\text{TiO}_2$ . These values are in good agreement with experiment values.<sup>[9, 10]</sup> The heterostructure was constructed by  $2 \times 3 \times 1$  unit of  $\text{BiVO}_4$ ,  $\text{C}_3\text{N}_4$  and  $3 \times 4 \times 1$  unit of anatase  $\text{TiO}_2$  monolayer. The anatase  $\text{TiO}_2$  monolayer was chosen from (001) face and (100) face. The lattice parameters were  $a= 11.328 \text{ \AA}$ ,  $b=15.104 \text{ \AA}$  for (001)  $\text{TiO}_2$  and  $a=9.486 \text{ \AA}$ ,  $b=15.104 \text{ \AA}$  for (100)  $\text{TiO}_2$ . The mismatch defined as

$$\varepsilon = \left| a_{\text{TiO}_2} - a_{\text{BiVO}_4} \right| \times 3 / \left| a_{\text{TiO}_2} + a_{\text{C}_3\text{N}_4} + a_{\text{BiVO}_4} \right|$$

for the parameters  $a$  and  $b$  of the heterostructure containing (001)  $\text{TiO}_2$  is only 4.9% and 0.9% which are in acceptable range. The mismatch for the parameters  $a$  and  $b$  of the heterostructure containing (100)  $\text{TiO}_2$  is 7.4% and 0.9%. A vacuum zone of  $20 \text{ \AA}$  was used to minimize the interactions between the adjacent systems for the  $\text{BiVO}_4/\text{C}_3\text{N}_4/\text{TiO}_2$  heterostructure. The interlayer distances between three layers are  $2.87 \text{ \AA}$  and  $3.01 \text{ \AA}$  for the containing (100)  $\text{TiO}_2$  heterostructures and containing (001)  $\text{TiO}_2$  heterostructures, respectively.

## Figures

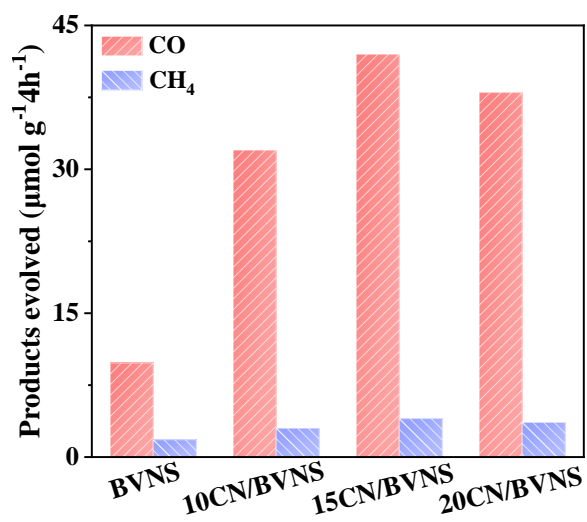

**Figure S1** Photocatalytic activities for CO<sub>2</sub> conversion of BVNS and xCN/BVNS under UV-visible-light irradiation for 4 h.

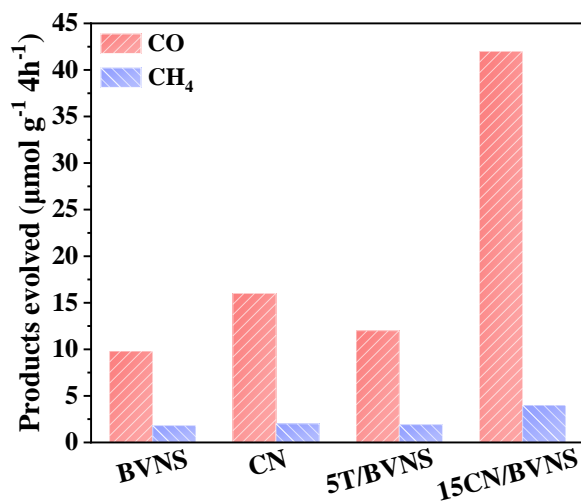

**Figure S2** Photocatalytic activities for CO<sub>2</sub> conversion of BVNS, CN, 5T/BVNS and 15CN/BVNS under UV-visible-light irradiation for 4 h.



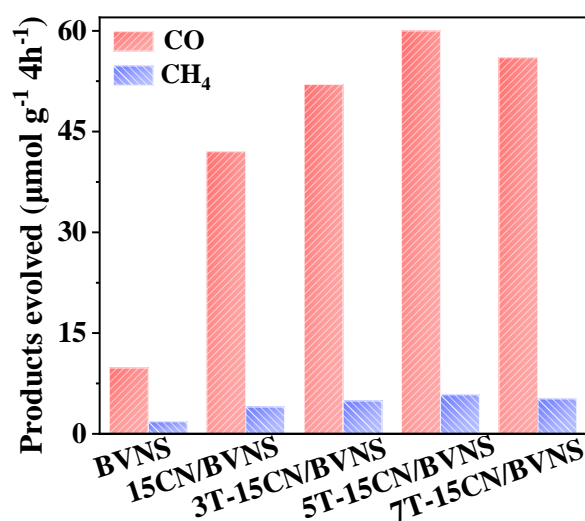

**Figure S3** Photocatalytic activities for CO<sub>2</sub> conversion of BVNS, 15CN/BVNS and yT-15CN/BVNS under UV-visible-light irradiation for 4 h.

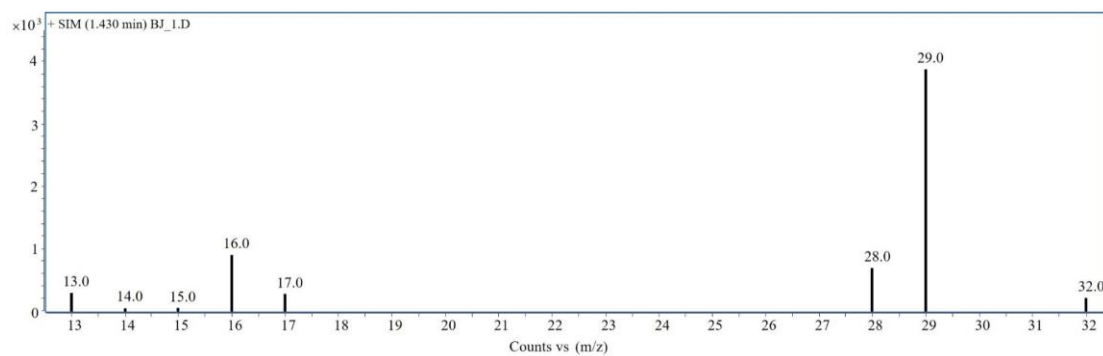

**Figure S4** Mass spectroscopy of the products over 5T-15CN/BVNS in photocatalytic reduction of <sup>13</sup>CO<sub>2</sub>. The major products <sup>13</sup>CO (m/z = 29) and <sup>13</sup>CH<sub>4</sub> (m/z = 17) and their fragments are observed.

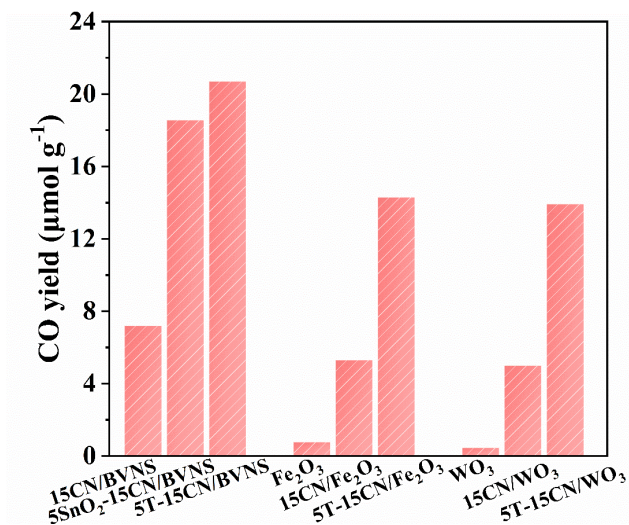

**Figure S5** Photocatalytic activities for CO<sub>2</sub> conversion of different samples under visible-light irradiation for 4 h.

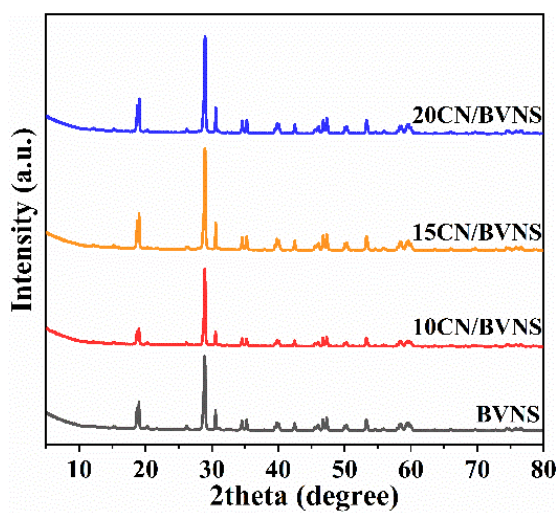

**Figure S6** XRD patterns of BVNS and xCN/BVNS nanocomposite.

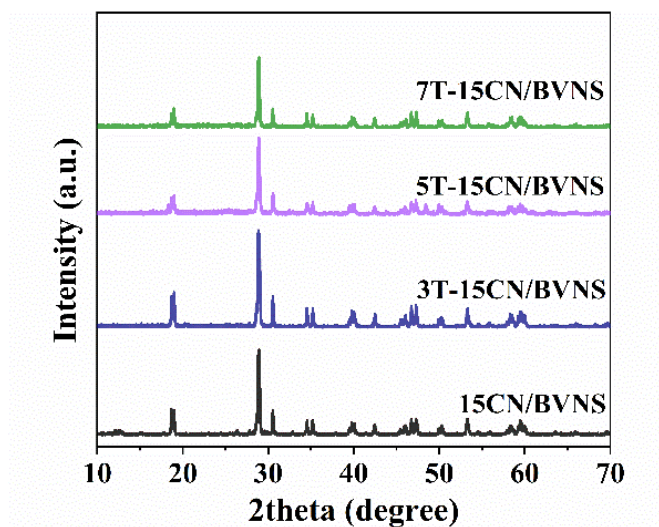

**Figure S7** XRD patterns of 15CN/BVNS and yT-15CN/BVNS.

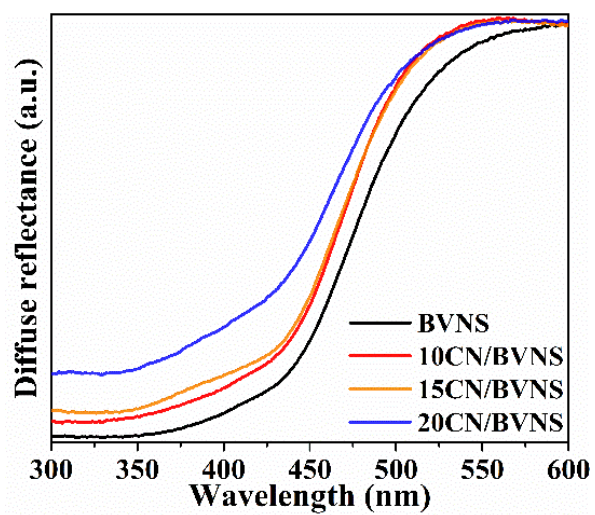

**Figure S8** DRS spectra of BVNS and xCN/BVNS nanocomposite.

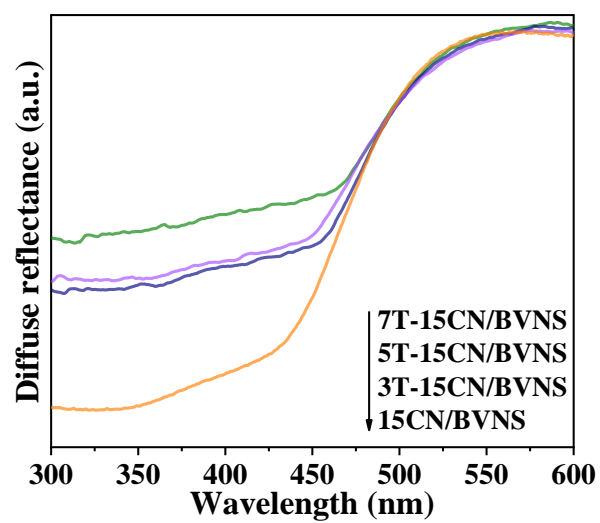

**Figure S9** DRS spectra of 15CN/BVNS and yT-15CN/BVNS.

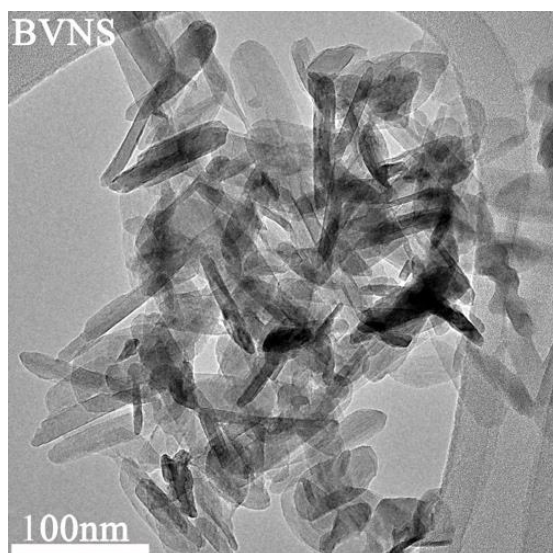

**Figure S10** TEM image of BVNS.

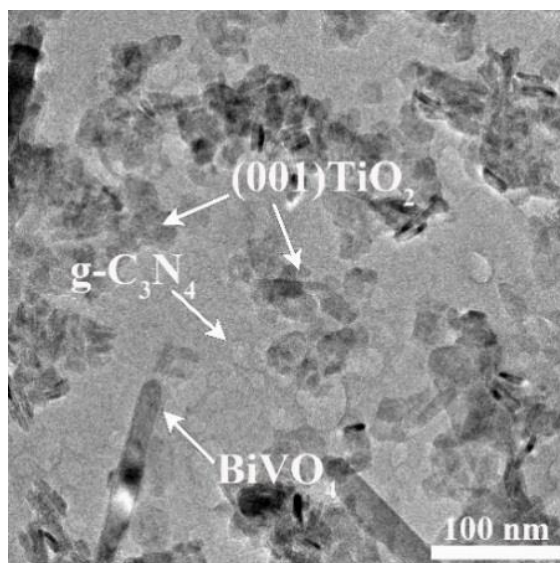

**Figure S11** TEM image of 5T-15CN/BVNS.

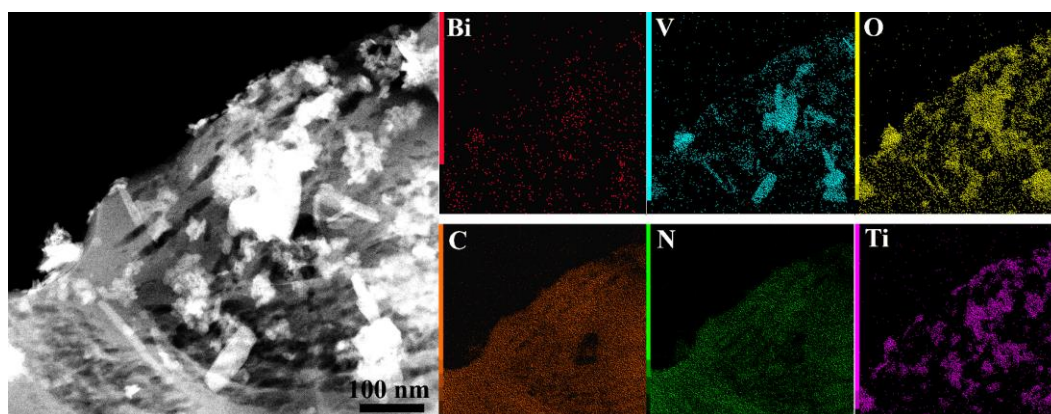

**Figure S12** STEM image of 5T-15CN/BVNS and the corresponding EDX mapping images of elemental Bi, V, O, C, N and Ti.

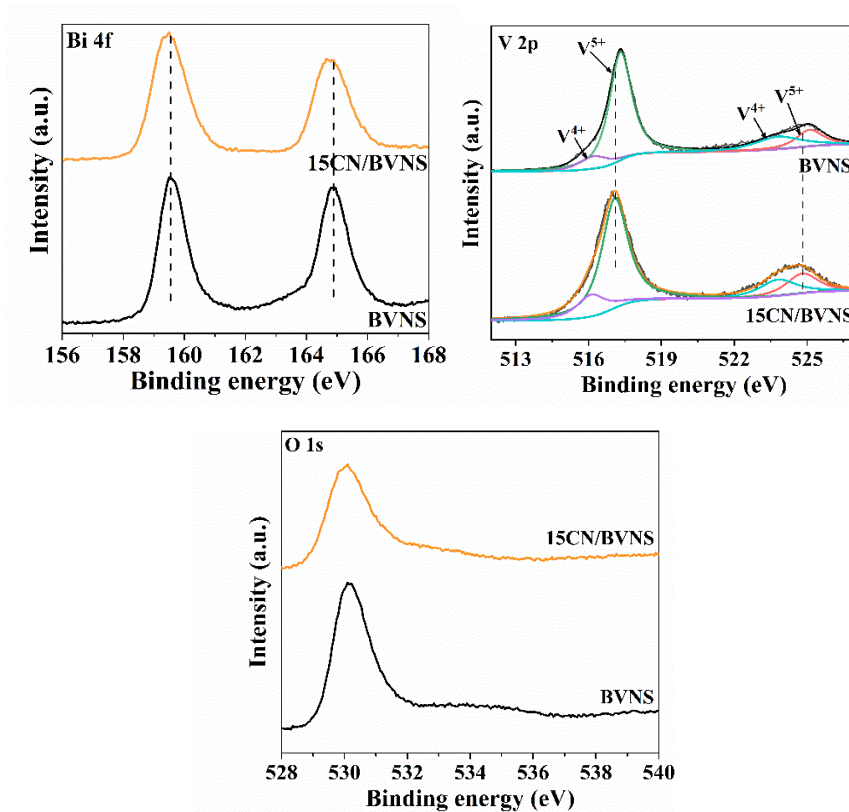

**Figure S13** XPS spectra of Bi 4*f*, V 2*p* and O 1*s* of BVNS and 15CN/BVNS.

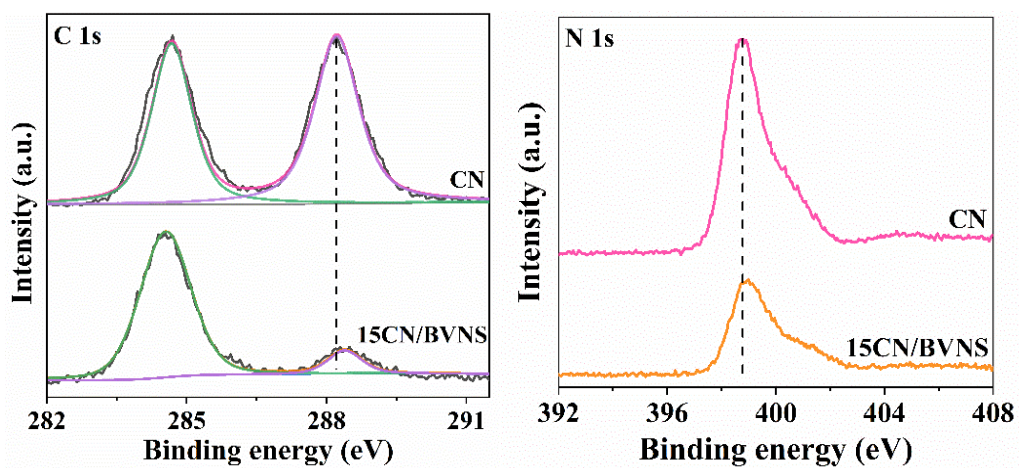

**Figure S14** XPS spectra of C 1*s* and N 1*s* of CN and 15CN/BVNS.

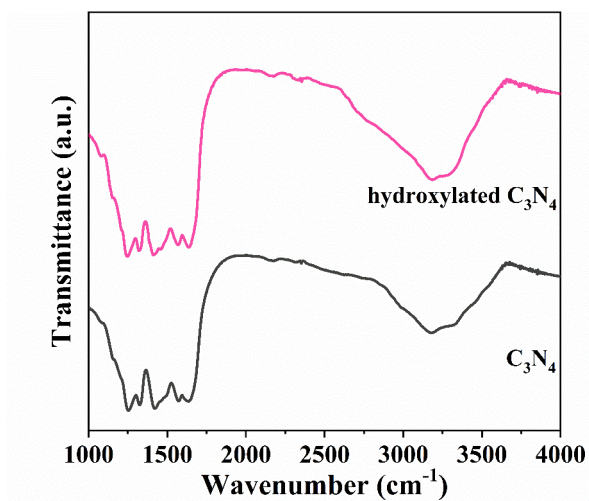

**Figure S15** FT-IR spectra of  $C_3N_4$  and  $HNO_3$ -treated hydroxylated  $C_3N_4$ , where the broad peak at  $3200\text{ cm}^{-1}$  mainly derived from the hydroxyl groups, and a significant increase in the area of the peak can also be found after  $HNO_3$  treatment.

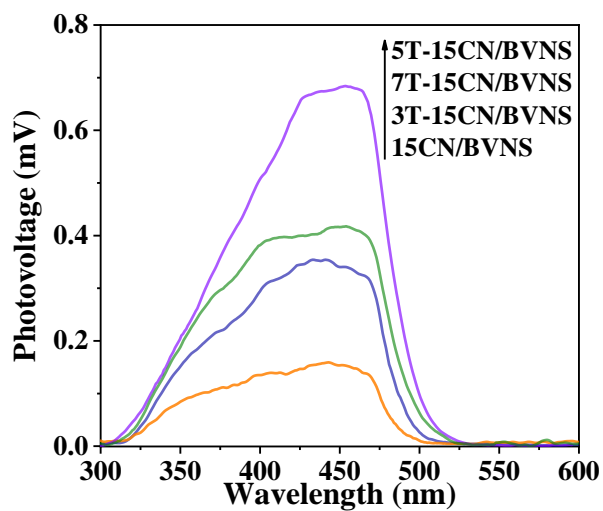

**Figure S16** SS-SPS responses of 15CN/BVNS and  $\gamma$ T-15CN/BVNS in  $N_2$  atmosphere.

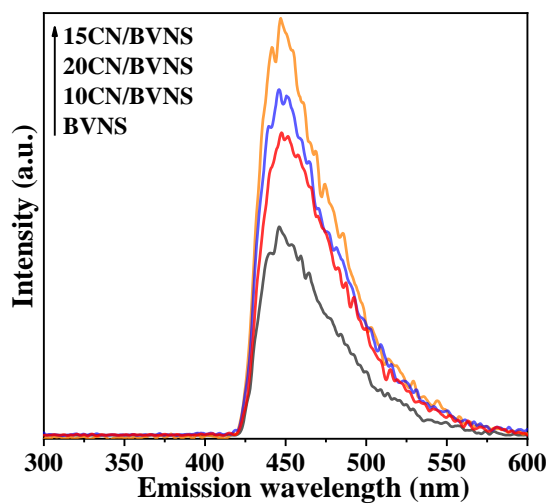

**Figure S17** Fluorescence spectra related to the formed hydroxyl radicals of BVNS and xCN/BVNS.

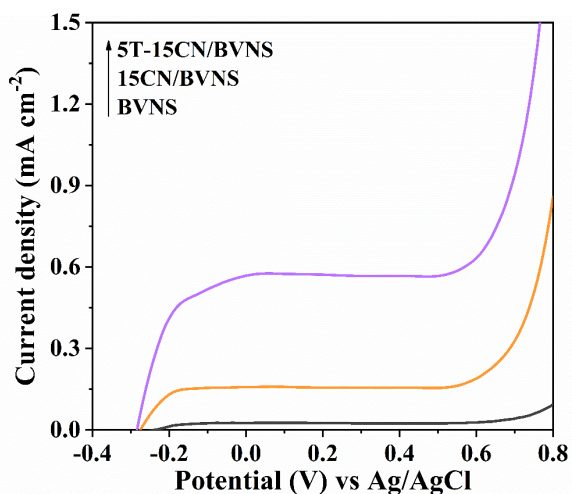

**Figure S18** LSV curves of BVNS, 15CN/BVNS and 5T-15CN/BVNS in 0.2 M Na<sub>2</sub>SO<sub>4</sub> electrolyte.



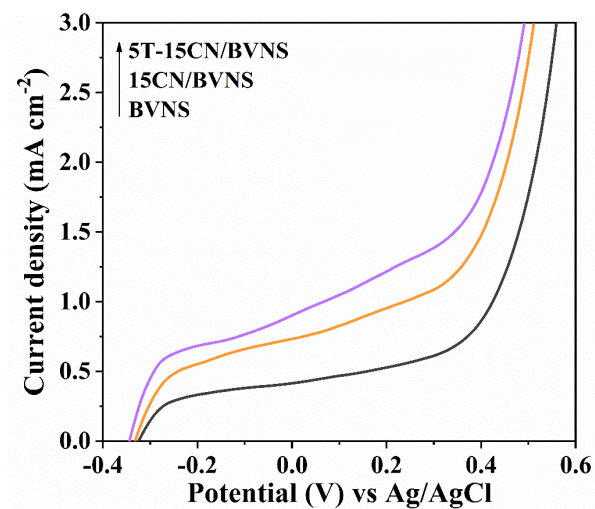

**Figure S19** LSV curves of BVNS, 15CN/BVNS and 5T-15CN/BVNS in 0.2 M Na<sub>2</sub>SO<sub>4</sub> electrolyte with 0.1 M Na<sub>2</sub>SO<sub>3</sub> as a hole sacrificial agent.

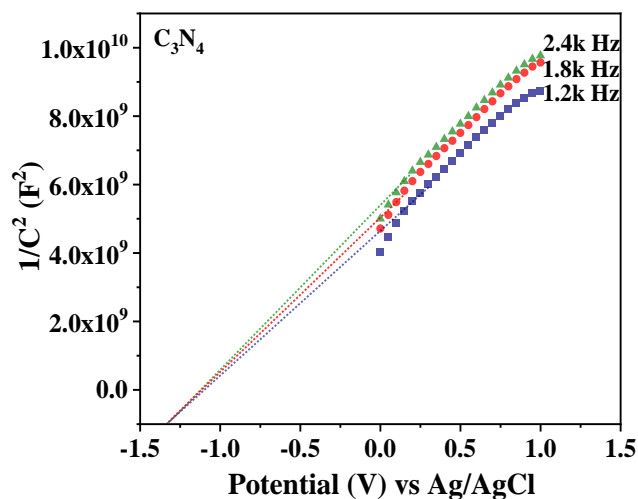

**Figure S20** Mott-Schottky plots of the resulting CN collected at various frequencies versus the saturated Ag/AgCl reference electrode.

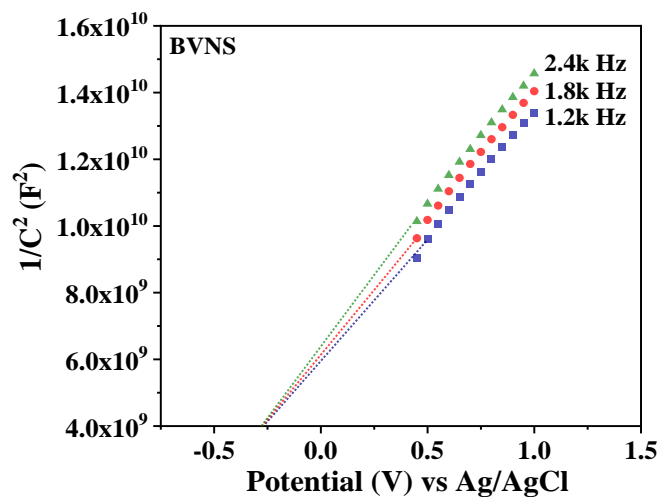

**Figure S21** Mott-Schottky plots of the resulting BVNS collected at various frequencies versus the saturated Ag/AgCl reference electrode.

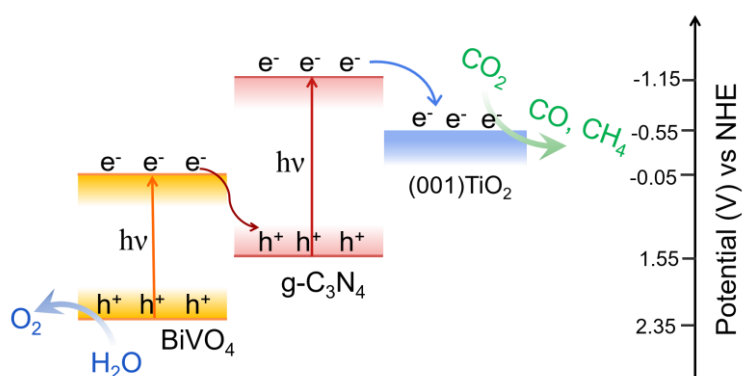

**Figure S22** Illustration of energy band structures of the cascade Z-scheme heterojunction composed of BVNS, CN and T.

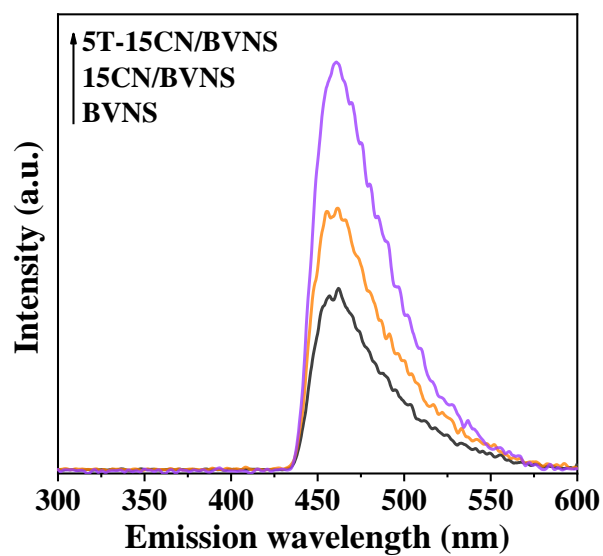

**Figure S23** Fluorescence spectra related to the formed hydroxyl radicals of BVNS, 15CN/BVNS and 5T-15CN/BVNS under 405 nm irradiation.

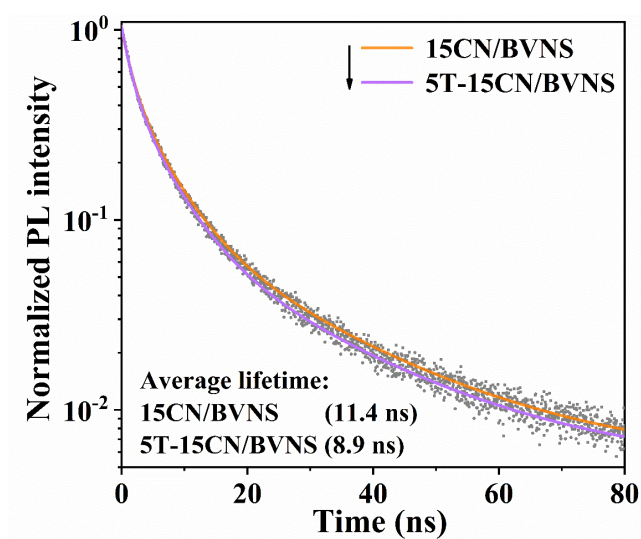

**Figure S24** Time-resolved PL spectra with excitation wavelength of 355 nm of 15CN/BVNS and 5T-15CN/BVNS.

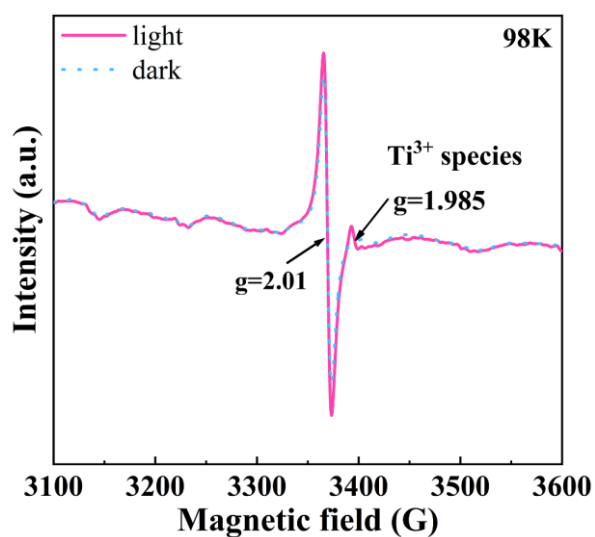

**Figure S25** EPR spectra of 30T/CN heterojunction in dark and under visible-light irradiation at 98K (30 is the mass ratio percentage of T to CN).

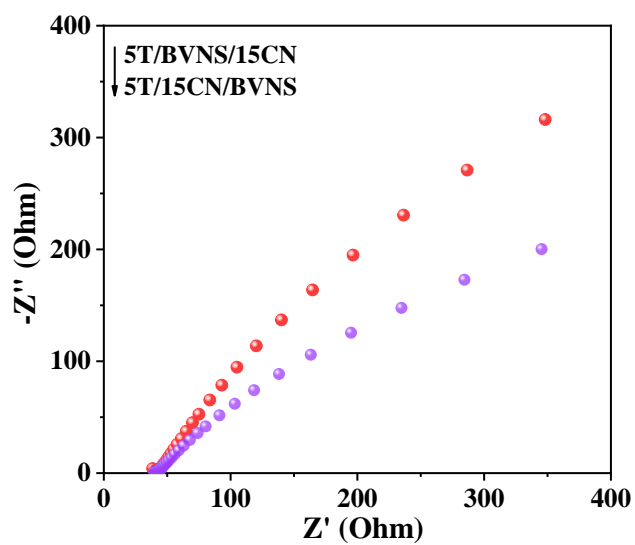

**Figure S26** EIS spectra of 5T/15CN/BVNS and 5T/BVNS/15CN.

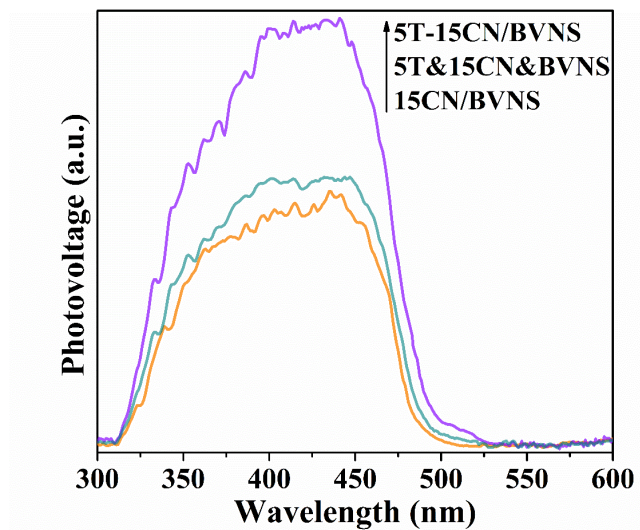

**Figure S27** SS-SPS responses of 15CN/BVNS, 5T-15CN/BVNS and 5T&15CN&BVNS in N<sub>2</sub> atmosphere.

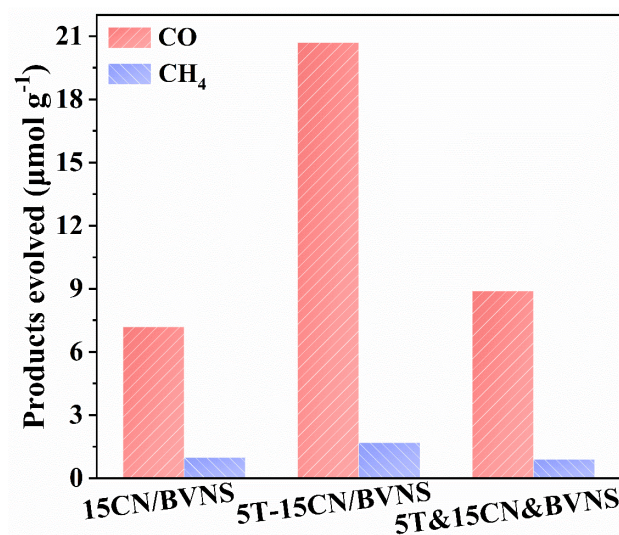

**Figure S28** Photocatalytic activities for CO<sub>2</sub> reduction of 15CN/BVNS, 5T-15CN/BVNS and 5T&15CN&BVNS under visible-light irradiation for 4 h.

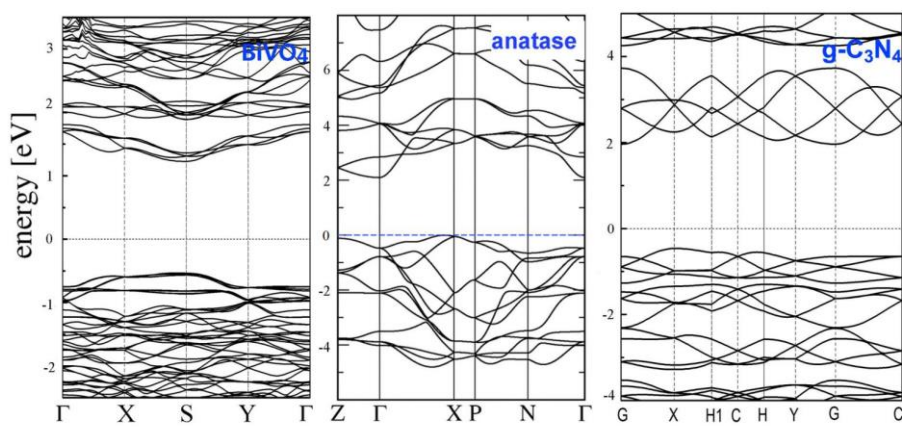

**Figure S29** The band structures of BiVO<sub>4</sub>, TiO<sub>2</sub> and g-C<sub>3</sub>N<sub>4</sub>, respectively.

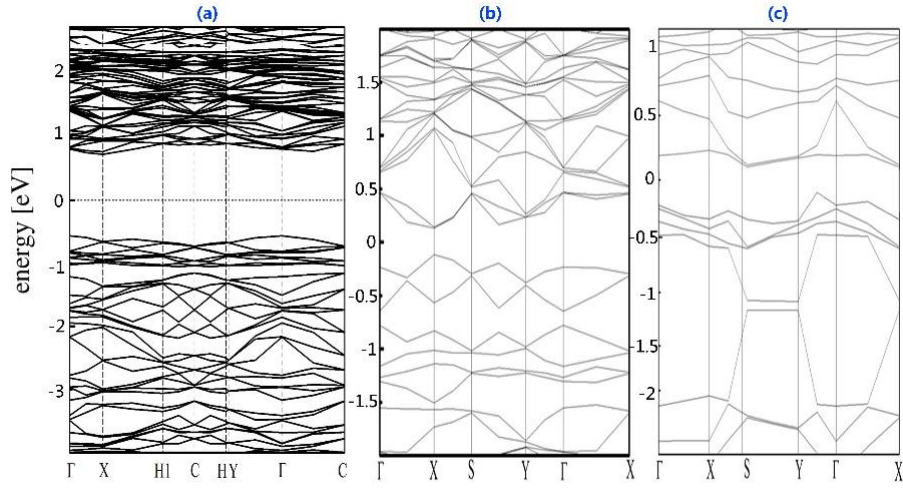

**Figure S30** The band structures of CN/BVNS (a), T-CN/BVNS (b), T-CN<sub>2L</sub>/BVNS (c), corresponding to the heterostructures (a)(b)(c) in Fig 6, respectively.

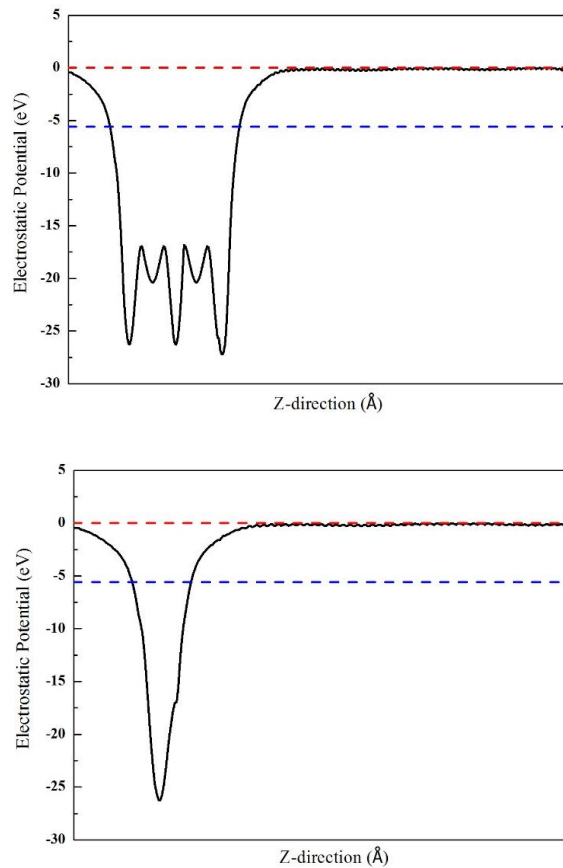

**Figure S31** Work functions (i.e. electrostatic potentials) of monolayer g-C<sub>3</sub>N<sub>4</sub> (top), and multilayer g-C<sub>3</sub>N<sub>4</sub> (lower part). The work function stays at 5.85 eV.

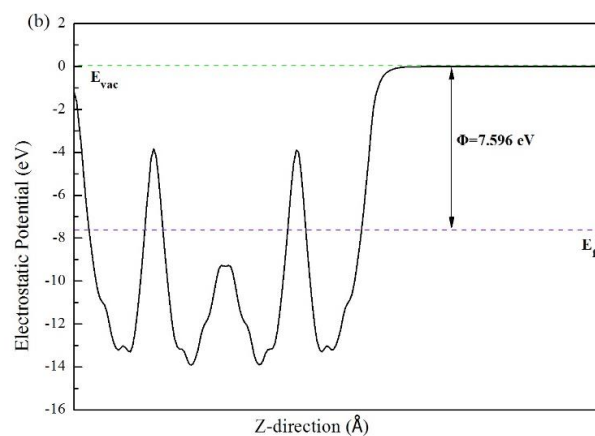

**Figure S32** Work functions (i.e. electrostatic potentials) of  $\text{BiVO}_4$  slab.

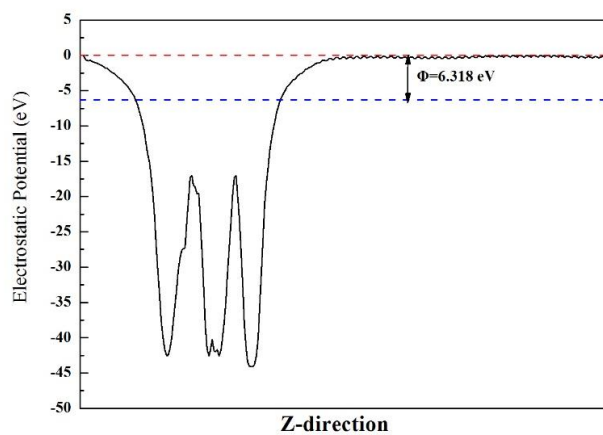

**Figure S33** Work functions (i.e. electrostatic potentials) of anatase  $\text{TiO}_2$  (001) slab.



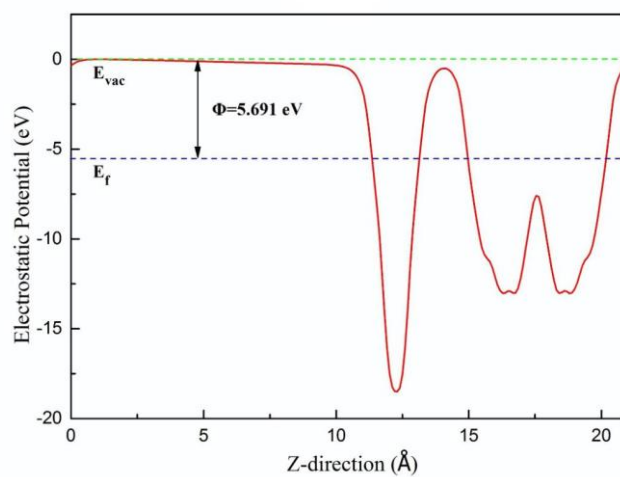

**Figure S34** Work functions (i.e. electrostatic potentials) of CN/BVNS.

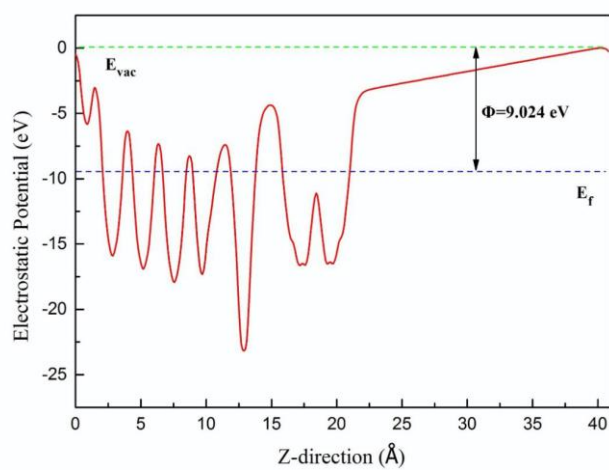

**Figure S35** Work functions (i.e. electrostatic potentials) of T-CN/BVNS.

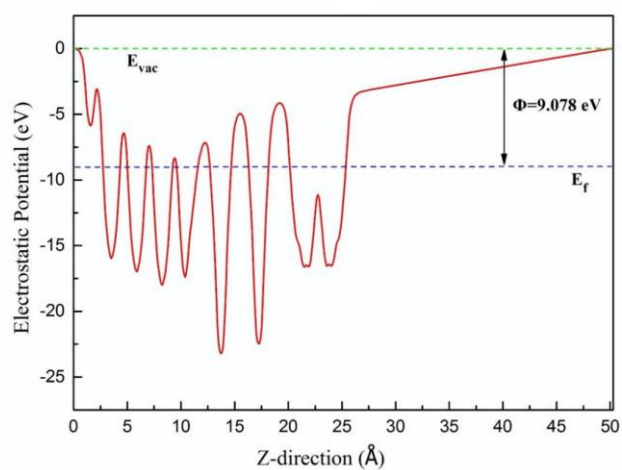

**Figure S36** Work functions (i.e. electrostatic potentials) of T-CN<sub>2L</sub>/BVNS.

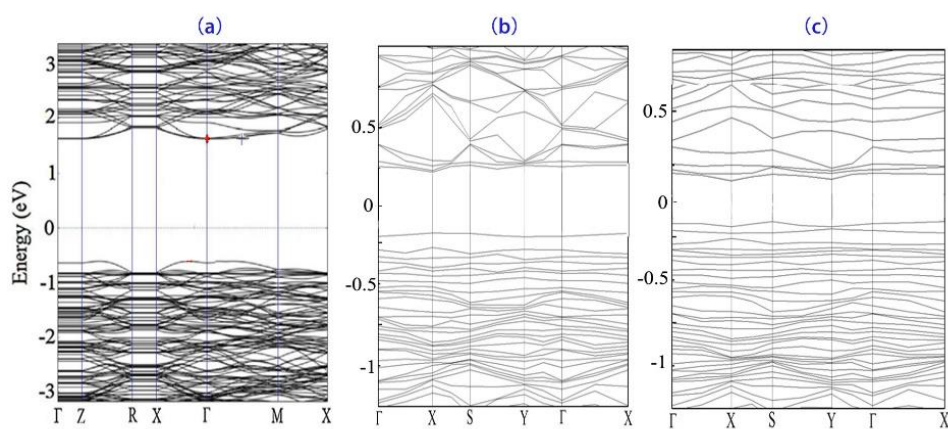

**Figure S37** The band structures of Im-CN/BVNS (a), T-Im-CN/BVNS (b), T-Im-CN-Im/BVNS (c), corresponding to the heterostructures (e)(f)(g) in Fig 6, respectively.

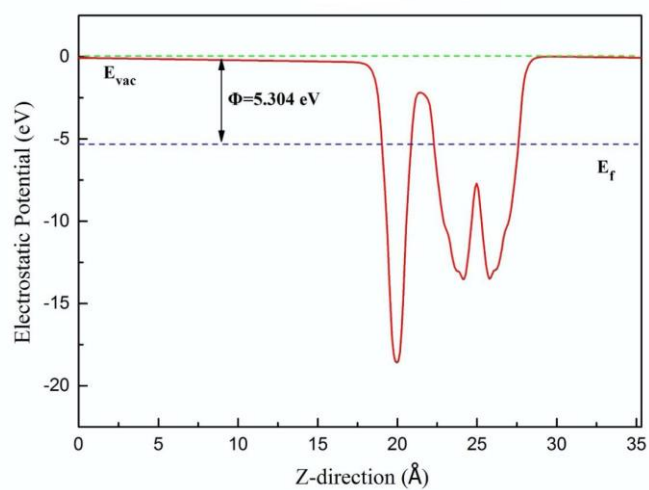

**Figure S38** Work functions (i.e. electrostatic potentials) of Im-CN/BVNS.

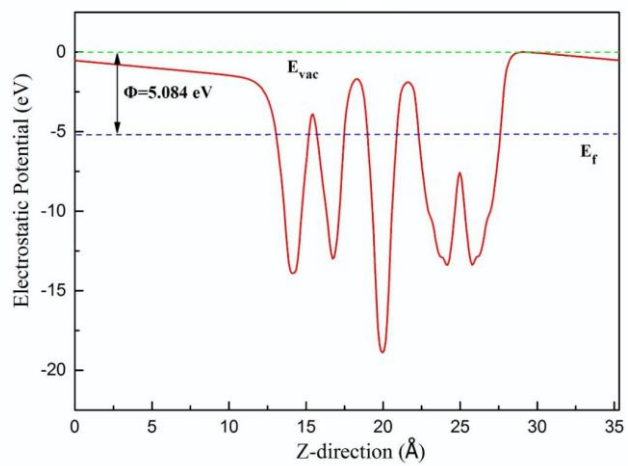

**Figure S39** Work functions (i.e. electrostatic potentials) of T-Im-CN/BVNS.

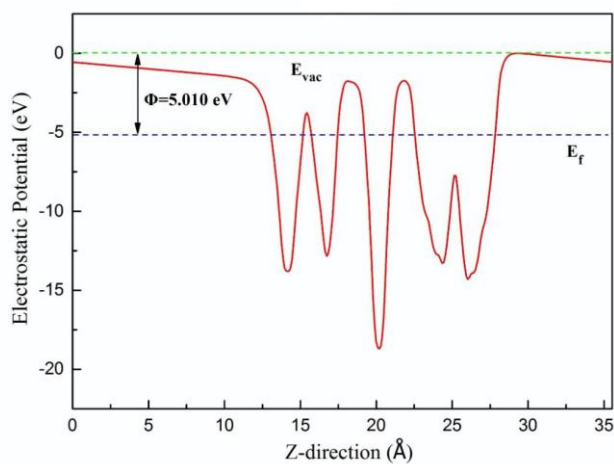

**Figure S40** Work functions (i.e. electrostatic potentials) of T-Im-CN-Im/BVNS.

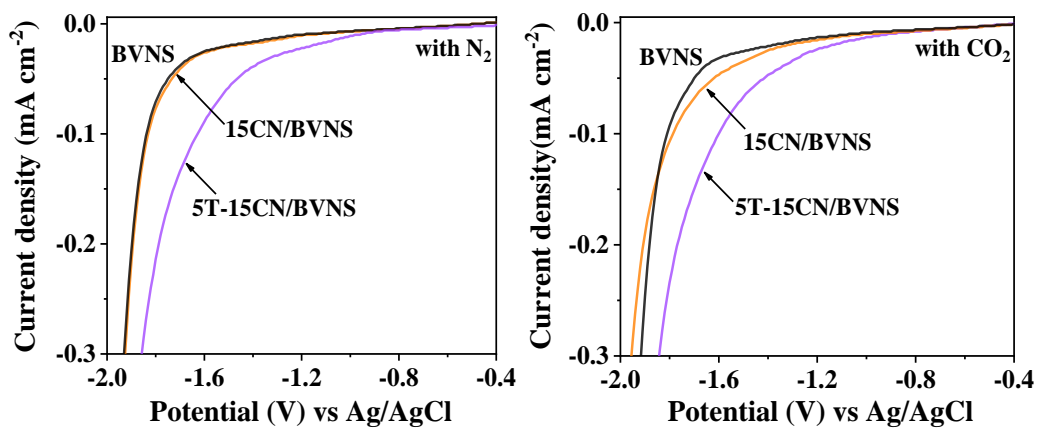

**Figure S41** Electrochemical reduction curves in  $N_2$ -bubbled and  $CO_2$ -bubbled systems of BVNS, 15CN/BVNS and 5T-15CN/BVNS.

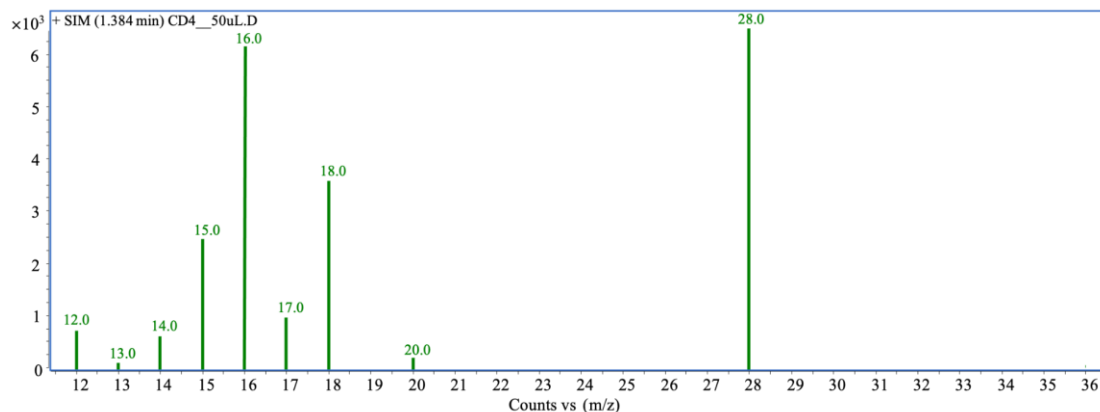

**Figure S42** The GC-Mass analysis of photocatalytic CO<sub>2</sub> reduction products on 5T-15CN/BVNS after irradiation for 4 h with methanol as a hole scavenger with D<sub>2</sub>O as a reductant. The major product CD<sub>4</sub> (m/z=20) and the related fragment CD (m/z =14), CD<sub>2</sub> (m/z =16), CD<sub>3</sub> (m/z =18) were detected apart from CD<sub>2</sub>H (m/z =17), CDH (m/z =15) as well as CO (m/z=28).

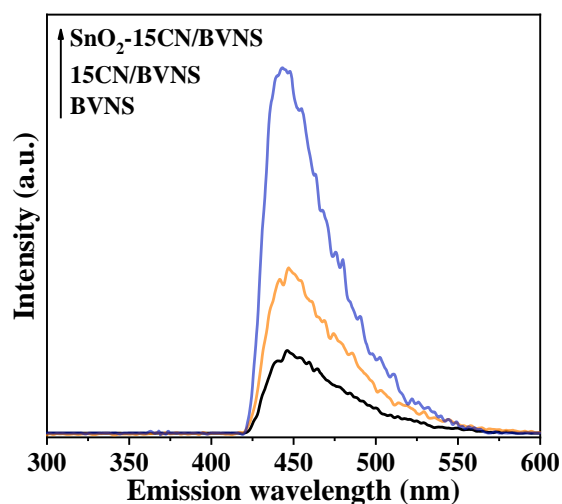

**Figure S43** Fluorescence spectra related to the formed hydroxyl radicals under visible-light irradiation.

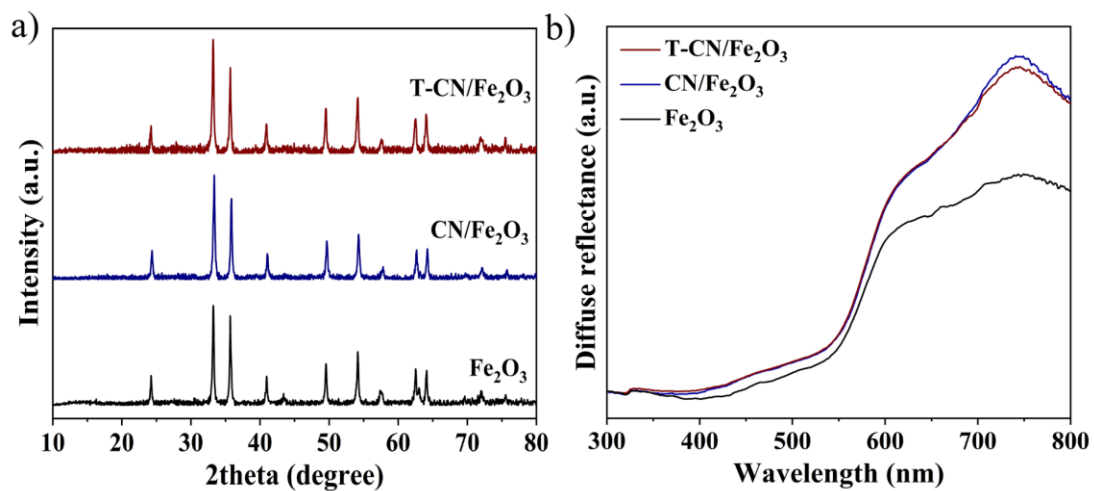

**Figure S44** XRD patterns (a) and DRS spectra (b) of Fe<sub>2</sub>O<sub>3</sub>, CN/Fe<sub>2</sub>O<sub>3</sub> and T-CN/Fe<sub>2</sub>O<sub>3</sub>.

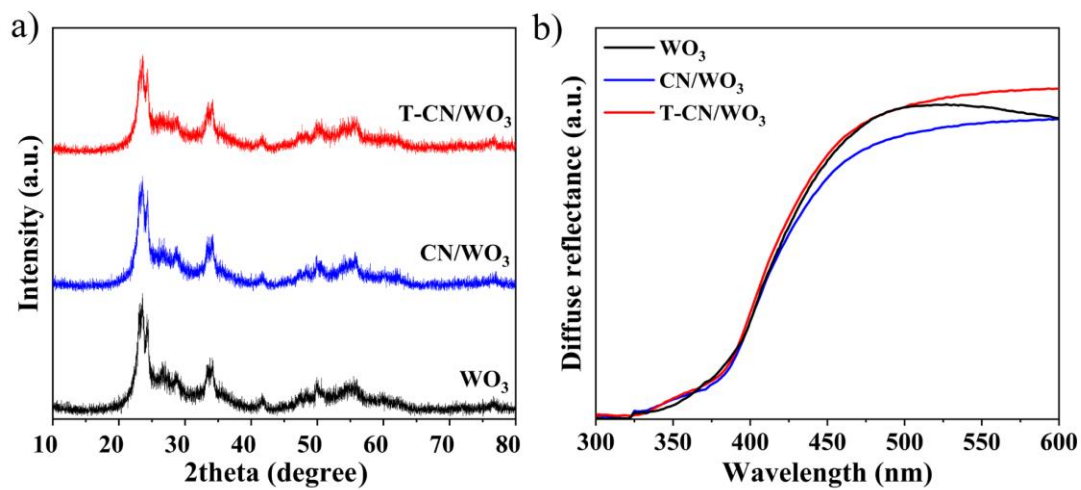

**Figure S45** XRD patterns (a) and DRS spectra (b) of WO<sub>3</sub>, CN/WO<sub>3</sub> and T-CN/WO<sub>3</sub>.

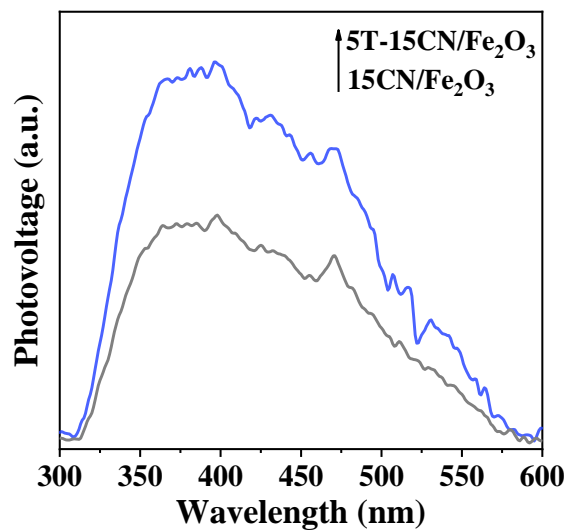

Figure S46 SPS responses of 15CN/Fe<sub>2</sub>O<sub>3</sub> and 5T-15CN/Fe<sub>2</sub>O<sub>3</sub>.

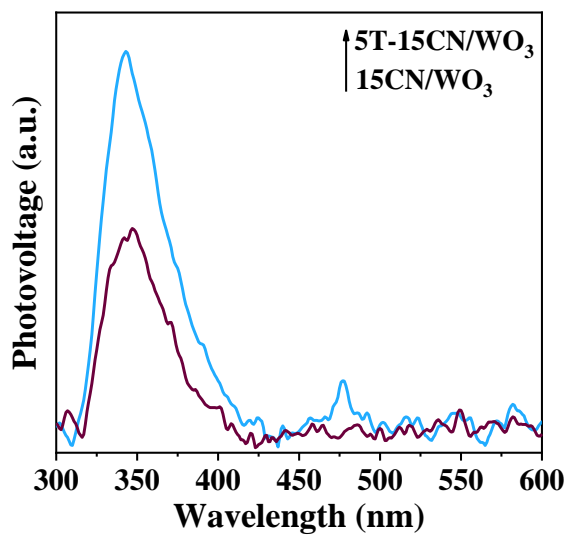

Figure S47 SPS responses of 15CN/WO<sub>3</sub> and 5T-15CN/WO<sub>3</sub>.

**Table S1** Comparison of photocatalytic CO<sub>2</sub> reduction performance of the reported BiVO<sub>4</sub>-based photocatalysts in Z-scheme charge transfer.

| Sample                                                                              | CO evolution<br>( $\mu\text{mol g}^{-1} \text{h}^{-1}$ ) | Light source<br>(W)                                | Ref.      |
|-------------------------------------------------------------------------------------|----------------------------------------------------------|----------------------------------------------------|-----------|
| 5T-15CN/BVNS                                                                        | 5.18                                                     | 300 W Xe lamp<br>( $\lambda \geq 420 \text{ nm}$ ) | This work |
| 15CN/BVNS                                                                           | 1.8                                                      | 300 W Xe lamp<br>( $\lambda \geq 420 \text{ nm}$ ) | This work |
| BVNS                                                                                | 0.29                                                     | 300 W Xe lamp<br>( $\lambda \geq 420 \text{ nm}$ ) | This work |
| ZnPc/BVNS                                                                           | 0.95                                                     | 300 W Xe lamp<br>( $\lambda \geq 420 \text{ nm}$ ) | [11]      |
| BiVO <sub>4</sub> /C/Cu <sub>2</sub> O                                              | 3                                                        | 300 W Xe lamp<br>( $\lambda \geq 420 \text{ nm}$ ) | [12]      |
| BiVO <sub>4</sub> /Ru-complex/(CuGa) <sub>1-x</sub> Zn <sub>2x</sub> S <sub>2</sub> | 2.2                                                      | 500 W Xe lamp<br>( $\lambda \geq 420 \text{ nm}$ ) | [13]      |
| CoO <sub>x</sub> /BiVO <sub>4</sub> /RGO/Cu <sub>2</sub> ZnGeS <sub>4</sub>         | 3.57                                                     | 300 W Xe lamp<br>( $\lambda \geq 420 \text{ nm}$ ) | [14]      |
| BiVO <sub>4</sub> {010}-Au-Cu <sub>2</sub> O                                        | 2.08                                                     | 300 W Xe lamp<br>( $\lambda \geq 420 \text{ nm}$ ) | [15]      |

**Table S2** The fitted results of Nyquist plots for BVNS, 15CN/BVNS and 5T-15CN/BVNS.

| Sample       | Rs( $\Omega$ ) | Rct( $\Omega$ ) | CPE(F cm <sup>-2</sup> ) |
|--------------|----------------|-----------------|--------------------------|
| BVNS         | 45.39          | 2033            | 2.44E-5                  |
| 15CN/BVNS    | 43.41          | 870.5           | 3.02E-5                  |
| 5T-15CN/BVNS | 41.91          | 436.1           | 3.64E-5                  |

**Table S3** The calculated surface charge transfer efficiency and photocurrent densities of BVNS, 15CN/BVNS and 5T-15CN/BVNS in 0.2 M Na<sub>2</sub>SO<sub>4</sub> electrolyte (pH 6.8) at the applied potential of 0.2 V versus Ag/AgCl without and with 0.1 M Na<sub>2</sub>SO<sub>3</sub>, respectively.

| Sample       | $J_{H_2O}$ (mA cm <sup>-2</sup> ) | $J_{Na_2SO_3}$ (mA cm <sup>-2</sup> ) | Surface charge transfer efficiency (%) |
|--------------|-----------------------------------|---------------------------------------|----------------------------------------|
| BVNS         | 0.03                              | 0.53                                  | 5.60                                   |
| 15CN/BVNS    | 0.15                              | 0.94                                  | 15.90                                  |
| 5T-15CN/BVNS | 0.57                              | 1.20                                  | 47.50                                  |



## References

- [1] Y. T. Xiao, G. H. Tian, W. Li, Y. Xie, B. J. Jiang, C. G. Tian, D. Y. Zhao, H. G. Fu, *J. Am. Chem. Soc.* **2019**, *141*, 2508-2515.
- [2] G. Kresse, J. Furthmüller, *Comput. Mater. Sci.* **1996**, *6*, 15-50.
- [3] G. Kresse, J. Furthmüller, *Phys. Rev. B: Condens. Matter Mater. Phys.* **1996**, *54*, 11169-11186.
- [4] P. E. Blochl, *Phys. Rev. B* **1994**, *50*, 17953-17979.
- [5] J. P. Perdew, K. Burke, M. Ernzerhof, *Phys. Rev. Lett.* **1996**, *77*, 3865-3868.
- [6] S. Grimme, J. Semiempirical, *Comput. Chem.* **2006**, *27*, 1787-1799.
- [7] J. Cerdá, F. Soria, *Phys. Rev. B* **2000**, *61*, 7965-7971.
- [8] J. Y. Xi, R. Jia, W. Li, J. Wang, F. Q. Bai, R. I. Eglitis, H. X. Zhang, *J. Mater. Chem. A* **2019**, *7*, 2730-2740.
- [9] A. W. Sleight, H. Y. Chen, A. Ferretti, *Mater. Res. Bull.* **1979**, *208*, 1571-1581.
- [10] J. K. Burdett, T. Hughbanks, G. J. Miller, J. W. Richardson, J. V. Smith, *J. Am. Chem. Soc.* **1987**, *109*, 3639-3646.
- [11] J. Bian, J. N. Feng, Z. Q. Zhang, Z. J. Li, Y. H. Zhang, Y. D. Liu, S. Ali, Y. Qu, L. L. Bai, J. J. Xie, D. Y. Tang, X. Li, F. Q. Bai, J. W. Tang, L. Q. Jing, *Angew. Chem. Int. Ed.* **2019**, *58*, 10873-10878.
- [12] C. Kim, K. M. Cho, A. Al-Saggaf, I. Gereige, H. T. Jung, *ACS Catal.* **2018**, *8*, 4170-4177.
- [13] T. M. Suzuki, S. Yoshino, T. Takayama, A. Iwase, A. Kudo, T. Morikawa, *Chem. Commun.* **2018**, *54*, 10199-10202.
- [14] A. Iwase, S. Yoshino, T. Takayama, Y. H. Ng, R. Amal, A. Kudo, *J. Am. Chem. Soc.* **2016**, *138*, 10260-10264.
- [15] C. G. Zhou, S. M. Wang, Z. Y. Zhao, Z. S. Shi, S. C. Yan, Z. G. Zou, *Adv. Funct. Mater.* **2018**, *28*, 1801214.
